1 **Predicting and Analyzing the Response to Selection on Correlated Characters**

2

3 Tom J.M Van Dooren<sup>1</sup>, Cerisse E. Allen<sup>2</sup>, Patrícia Beldade<sup>3,4</sup>

4

5 <sup>1</sup>CNRS/UPMC/UPEC/UPD/IRD/INRA – UMR 7618 Institute for Ecological and Environmental  
6 Sciences Paris (iEES), Sorbonne University, Case 237, 4 Place Jussieu, 75005 Paris, France

7 <sup>2</sup>Division of Biological Sciences, the University of Montana, Missoula, Montana, 59812 US

8 <sup>3</sup>Instituto Gulbenkian de Ciência, Rua da Quinta Grande 6, P-2780-156 Oeiras, Portugal

9 <sup>4</sup>UMR5174, Laboratoire Évolution & Diversité Biologique, Université Paul Sabatier, 118 route  
10 de Narbonne, Toulouse, France

11

12 Email for Correspondence: tvdooren@gmail.com

13 Version 10 October 2018

14 Keywords: Butterfly eyespots, evolutionary constraints, artificial selection, **G**-matrix,  
15 infinitesimal model, breeder's equation, correlated traits

16 **Data accessibility:** R scripts and data will be made available on Dryad and are shared upon  
17 request.

18 **ABSTRACT**

19 The breeder's equation generally provides robust predictions for the short-term evolution of  
20 single characters. When selection targets two or more characters simultaneously, there are often  
21 large discrepancies between predicted and observed responses. We assessed how well this  
22 standard model predicts responses to bivariate selection on wing color pattern characteristics in  
23 the tropical butterfly *Bicyclus anynana*. In separate laboratory selection experiments, two sets of  
24 serially repeated eyespots were subjected to ten generations of concerted and antagonistic  
25 selection for either size or color composition. We compared predicted and actual selection  
26 responses over successive generations, using the phenotypic data, selection differentials, and  
27 estimates of the genetic variance-covariance matrix  $\mathbf{G}$ . We found differences in the precision of  
28 predictions between directions of selection but did not find any evidence of systematic biases in  
29 our predictions depending on the direction of selection. Our investigation revealed significant  
30 environmental effects on trait evolution across generations. When these were accounted for,  
31 predictions using the standard model improved considerably. In the experiment on eyespot size,  
32 secondary splitting of selection lines allowed the estimation of changes in  $\mathbf{G}$  after nine  
33 generations of selection. Changes were not in general agreement with expectations from the  
34 breeder's equation. A contour plot of prediction errors across trait space suggests that directional  
35 epistasis in the eyespot genotype-phenotype map might occur but estimates of changes in  $\mathbf{G}$  are  
36 too model-dependent to verify whether they agree with that hypothesis. Altogether, our results  
37 underscore the need for quantitative genetics to investigate and estimate potential effects of  
38 multivariate non-linear genotype-phenotype maps and of environmental effects on  $\mathbf{G}$ .

## 39 INTRODUCTION

40

41 The 'breeder's equation', which we also call the 'infinitesimal model' (Barton et al. 2017; Turelli  
42 2017) is a robust and useful tool for understanding evolutionary dynamics. While simulations  
43 suggest that deviations from the Gaussian distributions assumed in this model usually have small  
44 effects (Turelli & Barton 1994; Zhang & Hill 2005), observed selection responses can differ  
45 from infinitesimal predictions (Sheridan 1988; Hill 2010; Roff 2007). When two or more  
46 characters are selected simultaneously, predictions for the multivariate response are often much  
47 less accurate (Falconer & Mackay 1996; Roff 2007). Multiple studies suggest that the response  
48 becomes more difficult to predict when two characters are selected in opposing directions  
49 (antagonistic selection) compared with selection in the same direction (concerted selection; Bell  
50 & Burris 1973; Falconer & Mackay 1996 1996; Roff 2007). Several alternative explanations for  
51 this poor predictability of antagonistic selection have been proposed (reviewed in Roff 2007), as  
52 well as methods to assess them. A first possibility is that the breeder's equation would predict  
53 approximately correct, but that the data analysis is more cumbersome. Secondly, there might  
54 simply be too few examples comparing *a priori* predictions with empirical results to draw robust  
55 conclusions about the predictability of bivariate or multivariate evolution. Another possibility  
56 could be that predicting the response of many traits might require a much more elaborate model  
57 selection procedure and increased risk of prediction biases. Alternatively, the standard  
58 quantitative genetic models may be deemed inadequate - either too simplified, or failing to  
59 account for critical underlying factors, such as developmental interactions, that might limit  
60 phenotypic evolution (Pigliucci & Schlichting 1997) in a way not covered by the equations. In

61 data analysis, when we are unable to predict responses well, explanations will therefore range  
62 from inference issues to a fundamental failure to capture properties of the biological system well.  
63 Failing at predicting responses to selection almost appears more exciting than obtaining good  
64 predictions. It is, however, possible to embed the breeder's equation into a model selection and  
65 model simplification framework from which potentially improved predictions and much insight  
66 can be gained when mechanistic models are used (Le Rouzic et al. 2011). Environmental effects  
67 and changes to the genotype-phenotype map which have been invoked to explain results of  
68 selection experiments (Okada & Hardin 1967) can be fitted to the data. However the approach is  
69 currently only available for single traits and can therefore not be used yet to understand  
70 differences in performance of the breeder's equation in a multivariate setting.

71 Some model simplifications leading to inaccurate predictions might not be core assumptions of  
72 the breeder's equation and would therefore not warrant rejecting it, when they rather follow from  
73 common practise and usually remain untested. For instance, short-term changes in additive  
74 genetic variance and covariance due to selection over a few generations are often assumed to be  
75 negligible, and are typically ignored. However, the effects of selection and drift can change these  
76 parameters within a relatively small number of generations. Ignoring such changes might be one  
77 cause of poor predictability of selection response in a number of analyses. Short-term selection  
78 experiments ( $\geq 5$  generations; Hill 2011) are useful for assessing changes in components of  $\mathbf{G}$   
79 during the course of selection (Hill 2011; Heath et al 1995; Martinez et al. 2000; Meyer & Hill  
80 1991; Beniwal et al. 1992). Predicting multivariate selection-induced effects on  $\mathbf{G}$  (the genetic  
81 variance-covariance matrix) remains involved, despite a great deal of theory (e.g., Lande 1979;

82 Barton & Turelli 1987; Johnson & Barton 2005) and empirical work (e.g., Meyer & Hill 1991;  
83 Beniwal et al. 1992; Heath et al 1995).

84 There are several ways to test whether the standard multivariate breeder's equation is appropriate  
85 in a given context. Demonstrating non-Gaussian genotype and phenotype distributions may  
86 invalidate the model, but not immediately demonstrate that selection responses are poorly  
87 predicted. In non-pedigreed populations subject to artificial laboratory selection, standard  
88 selection analysis uses least-squares techniques to assess model fit (Falconer & Mackay 1996).  
89 By fitting the standard model to observed responses in a series of different selection lines,  
90 patterns in the residuals of the predicted means can be investigated, in a strategy that is  
91 frequently used for model validation in other contexts. The usefulness of this exercise relies on  
92 accurately estimating both  $\mathbf{G}$  and  $\boldsymbol{\beta}$  (the selection gradient), which will depend on the design of  
93 the artificial selection experiment. When the experimental design allows  $\mathbf{G}$  to be estimated  
94 separately both at the start and end of the experiment, it is possible to determine whether  $\mathbf{G}$   
95 estimated after several generations of selection still fits the predictions of the infinitesimal model  
96 (the "Gaussian population" approximation, Turelli 2017), given the starting estimate of  $\mathbf{G}$  and the  
97 empirical selection gradient. Thus, it is possible to test whether  $\mathbf{G}$  has changed during the course  
98 of selection, and whether such changes are predicted by the infinitesimal model. Because the  
99 assumptions of the standard infinitesimal model are likely violated after many generations of  
100 selection during which  $\mathbf{G}$  may undergo substantial changes, tests of the infinitesimal model are  
101 most appropriately applied to selection experiments with small to intermediate numbers of  
102 generations, where the model is generally believed to perform well. When changes in  $\mathbf{G}$  are  
103 estimated, it is far from straightforward to assign multivariate estimated changes in different

104 treatment groups (Arnold et al. 2008) to mechanisms. As stated already, statistical modelling  
105 tools to do that in the context of time series of selection responses are not immediately available.  
106 It can also happen that the infinitesimal model does produce adequate predictions, but that  $G$  has  
107 changed in a way not anticipated by it.

108 To assess how well the standard infinitesimal model predicts bivariate evolution and to  
109 investigate whether this model still improves our understanding of the biological system, we  
110 analyzed phenotypic data from two artificial selection experiments targeting correlated eyespot  
111 characters in the tropical butterfly *Bicyclus anynana* (Nymphalidae: Satyrinae). These characters  
112 were 1) eyespot size (relative to wing size), a trait largely determined by the strength of the  
113 eyespot-organizing morphogen produced by the cells at the center of the presumptive eyespot,  
114 and 2) eyespot color-composition (proportion of black and gold), a trait probably determined by  
115 the sensitivity thresholds to an eyespot-inducing signal (see Beldade & Brakefield 2002, Beldade  
116 et al. 2008, Allen et al. 2008). We currently lack direct evidence concerning the number of loci  
117 or distributions of allelic effects underlying these eyespot characteristics in *B. anynana*. A  
118 significant portion of the standing variation for size and color composition appears to be additive  
119 (Monteiro et al. 1994; Monteiro et al. 1997; Beldade et al. 2002b), and allelic variation at the  
120 Distal-less locus accounts for up to 20% of the difference between lines selected for the size of  
121 either the anterior dorsal forewing eyespot EyeA or the posterior dorsal forewing eyespot EyeP  
122 (Beldade et al. 2002a). Very little is known about the genetic architecture underlying eyespot  
123 color composition, though models suggest that the diffusion gradient-threshold mechanisms  
124 employed in eyespot development likely generate nonlinear gene effects (Gilchrist & Nijhout  
125 2001).

126 In each experiment, pairs of eyespots were selected in both concerted and antagonistic  
127 directions (analyses of the phenotypic responses are reported by Allen et al. 2008; Beldade et al.  
128 2002b). The structure of the  $\mathbf{G}$  matrix seemed comparable between size and color composition  
129 traits in previous analysis (Allen et al. 2008), such that different outcomes between selection  
130 experiments prompted a discussion on the relevance of quantitative genetic methods for this  
131 model system.

132 We re-analyzed the data more elaborately than before and with  $\mathbf{G}$  re-estimated for each  
133 experiment. To predict selection responses, we used different estimates of  $\mathbf{G}$  per experiment: one  
134 estimate obtained from a separate breeding experiment using the unselected stock population,  
135 and another estimate obtained using data from the base population (prior to selection) and the  
136 first generation after selection. Descendants of the base population were partitioned into several  
137 lines selected in several directions, targeting eyespot size (in the first experiment; Beldade et al.  
138 2002b,c) or eyespot color composition (in the second experiment; Allen et al. 2008). Model  
139 selection and comparison allowed us to determine whether the choice of model effects fitted  
140 biased our estimates of  $\mathbf{G}$ . Using those estimates of  $\mathbf{G}$ , we subsequently predicted selection  
141 responses and assessed model fit to the selection data by analyzing the residuals from these  
142 predictions. To avoid analyzing spurious patterns in these data resulting from a sub-optimal fit,  
143 we made a further effort to select and fit a model which best predicted the actual selection  
144 response and minimized the overall variance of residuals. In addition, the experimental design of  
145 the eyespot size experiment allowed us to estimate  $\mathbf{G}$  again after nine generations of selection  
146 and compare that estimate with infinitesimal model predictions.

147



148 **MATERIALS AND METHODS**

149

150 *Artificial selection experiments*

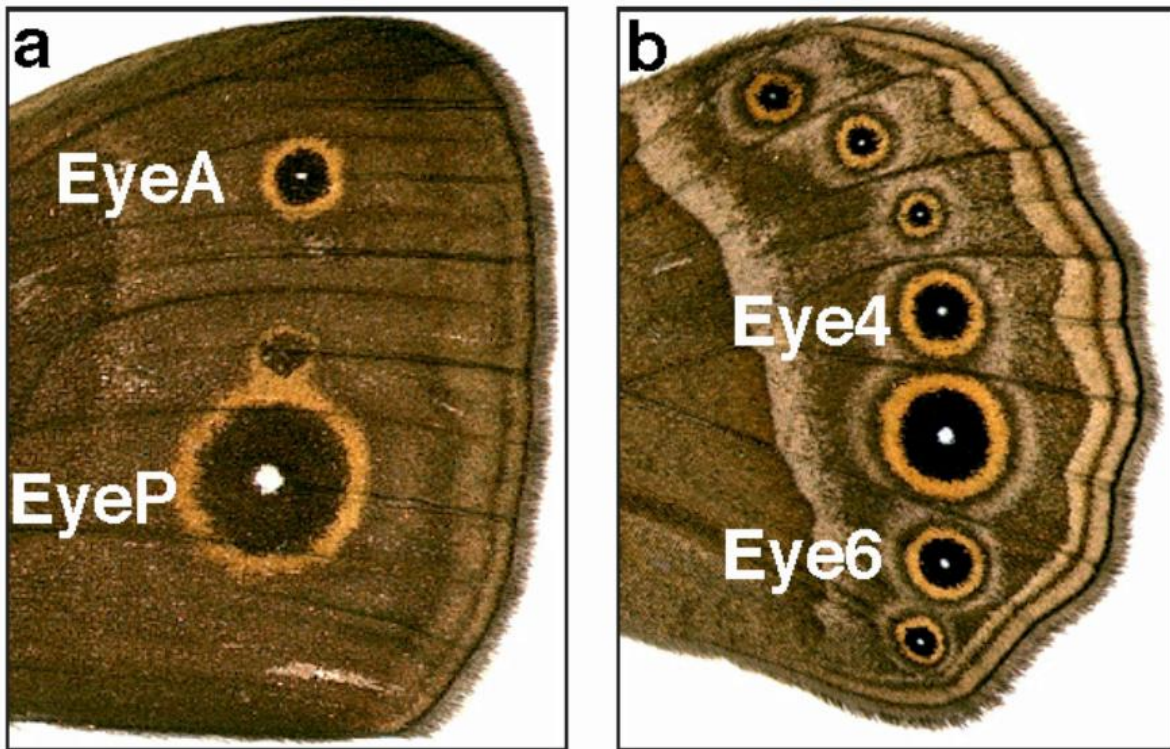

151

152 **Figure 1.** Location and form of the dorsal forewing and ventral hindwing eyespots of *Bicyclus anynana*.

153 The dorsal forewing in **A** illustrates the locations of the anterior (EyeA) and posterior (EyeP) eyespots.

154 Selection targeted combinations of eyespot sizes; size was measured relative to total wing size (see text).

155 The ventral hindwing in **B** illustrates all seven eyespots, with markers indicating the locations of the two

156 eyespots (Eye4 and Eye6) targeted by simultaneous selection for color composition. Color composition

157 was estimated as the diameter of the inner black ring relative to total eyespot diameter (see text for

158 details).



159 In two separate experiments, we selected for either the relative size of two dorsal forewing  
160 eyespots (EyeA and EyeP, for the anterior and posterior eyespots, respectively, typically found  
161 on the forewing), or the color composition of two ventral hindwing eyespots (Eye4 and Eye6, for  
162 the fourth and sixth eyespots, respectively, of the seven typically found on that wing surface) of  
163 *Bicyclus anynana* (Figure 1). The starting population (Gen0, for generation zero) for each  
164 experiment was derived from the same outbred stock maintained in the laboratory for > 100  
165 generations at high  $N_e$  (Brakefield et al. 2001). In both experiments, only females were selected  
166 and selection was maintained at similar intensities for 10 generations. Per line and per  
167 generation, we measured 150–200 females for size (mean  $\pm$  SE:  $173 \pm 3$ ) and 140–240 females  
168 for color composition (mean  $\pm$  SE:  $209 \pm 5$ ). We selected 40 females per line every generation;  
169 in the size experiment this number decreased to 35 females per line between generations 5–10.  
170 Details including choice of traits for selection, selection criteria, selection procedure, and  
171 analysis of the rates of response to selection are described in (Allen et al. 2008; Beldade et al.  
172 2002 b,c). Here we report eyespot size (relative to wing size) and color composition (size of the  
173 black disc relative to total eyespot size) as percentages.

174 In both experiments, we established three types of lines from the starting population (see Fig. 2):  
175 1) antagonistic selection lines where two eyespots were selected in opposite directions (e.g.  
176 larger EyeA and smaller EyeP), orthogonal to the main axis of phenotypic and genetic  
177 correlations among eyespots; 2) concerted selection lines where two eyespots were selected in  
178 the same direction (e.g. larger EyeA and EyeP), parallel to the main axis of phenotypic and  
179 genetic correlations among eyespots; and, 3) unselected control (UC) lines. Each direction of  
180 selection was replicated twice. In both experiments, lines were selected for 10 generations, but as

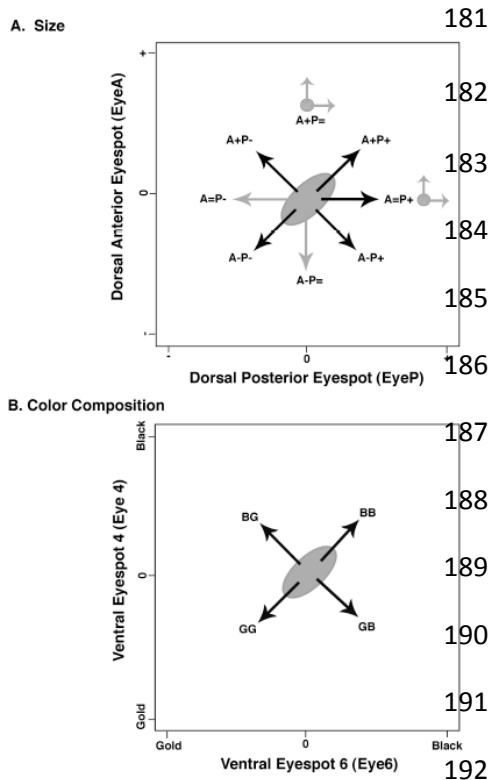

**Figure 2.** Directions of artificial selection imposed on eyespot size and eyespot color composition in *Bicyclus anynana*. Ellipses represent the location of the starting (stock) population. Selection occurred for ten generations (black arrows) in most directions; gray arrows signify directions where only a single generation of selection occurred. **A**, artificial selection simultaneously targeted the size (relative to wing size) of the anterior (EyeA) and posterior (EyeP) eyespots on the dorsal forewing surface. Eyespots were selected for increased size (+), decreased size (-), or constant size (=). After nine generations (small gray circles), butterflies from lines A+P= and A=P+ were split into subpopulations and selected along two orthogonal directions for one generation (short gray arrows). **B**, artificial selection simultaneously targeted the color composition (amount of black relative to total size) of the fourth and sixth eyespots on the ventral hindwing. Eyespots Eye4 and Eye6 were selected for either increased proportion of gold (G) or increased proportion of black (B) scales, for ten generations. Selection on eyespot color composition occurred only along the concerted (both eyespots selected in the same direction) or antagonistic (each eyespot selected in a different direction) axes, and there was no further splitting of lines.

193 (=). After nine generations (small gray circles), butterflies from lines A+P= and A=P+ were split into  
194 subpopulations and selected along two orthogonal directions for one generation (short gray arrows). **B**,  
195 artificial selection simultaneously targeted the color composition (amount of black relative to total size)  
196 of the fourth and sixth eyespots on the ventral hindwing. Eyespots Eye4 and Eye6 were selected for either  
197 increased proportion of gold (G) or increased proportion of black (B) scales, for ten generations. Selection  
198 on eyespot color composition occurred only along the concerted (both eyespots selected in the same  
199 direction) or antagonistic (each eyespot selected in a different direction) axes, and there was no further  
200 splitting of lines.

201

202 several of the color lines were lost through error in the final generation, response is shown for  
203 that experiment after nine generations of selection only.

204 In the eyespot size experiment, two additional types of lines were established from the starting  
205 population (Fig. 2): 4) uncoupling selection lines where one eyespot was subjected to directional  
206 selection and the other eyespot was simultaneously subjected to stabilizing selection (e.g. larger  
207 EyeA and constant EyeP); and 5) re-split lines where, after nine generations of selection, two of  
208 these directional/stabilizing selection lines were each split into two populations and selected  
209 either along the original axis or an orthogonal axis for an additional generation.

210

### 211 *Estimates of G*

212

213 **Outbred laboratory stock population.** We used a paternal half-sib breeding design {Lynch &  
214 Walsh 1998} to estimate additive genetic variance and covariance of four eyespot characters in  
215 our stock population at a time between the two selection experiments. We randomly selected 100  
216 virgin males from the outbred stock at adult eclosion and allowed each male to mate sequentially  
217 with at least two virgin females. At hatching, ~30 eggs per female were transferred to mesh  
218 rearing cages and fed on young maize plants ad libitum until pupation. Full-sib offspring were  
219 reared together but densities were kept low to minimize interactions and competition between  
220 individuals. Rearing cages were moved every four days to randomize environmental effects  
221 within the growth chamber. Emerging adult offspring were allowed several hours for their wings  
222 to expand and fully harden before being frozen for later measurements.

223 Five female offspring were randomly selected from each of 174 full-sib families (representing 87  
224 sires who successfully produced offspring by two dams each) and dorsal forewing eyespots

225 EyeA and EyeP, and ventral hindwing eyespots Eye4 and Eye6 were measured as described on  
226 the left wings only of each individual. We used our nested breeding design to obtain REML  
227 estimates of sire, dam (nested within sires), and progeny variance and covariance components in  
228 the software package ASReml (VSN International, 2006). We tested for differences between the  
229 dam and sire genetic covariance matrices using a likelihood ratio test, which is a conservative  
230 approach (Pinheiro & Bates 2000; Verbeke & Molenberghs 2000). Both the dam and sire  
231 covariance matrices are reported.

232

233  **$G_0$  in the starting population.** With equal phenotypic and genetic variances in both sexes,  
234 random mating among parents, and no environmental changes, the expected bivariate mean  
235 phenotypic trait vector in the first generation after artificial selection, for a selection line  $i$ , is  
236 described by

237

$$238 \quad \boldsymbol{\mu}_{i1} = \boldsymbol{\mu}_0 + \mathbf{G}_0 \mathbf{P}_0^{-1} \mathbf{s}_{i0} / 2, \quad (1)$$

239

240 Where  $\boldsymbol{\mu}_0$  is the mean phenotypic trait vector in the base/starting population,  $\mathbf{s}_{i0}$  is the selection  
241 differential for females from the base population that initiate line  $i$ ,  $\mathbf{G}_0$  the genetic variance-  
242 covariance matrix, and  $\mathbf{P}_0$  the phenotypic variance-covariance matrix in the base population.  
243 When there are common environmental effects on mean trait values in generation one, these can  
244 be added as vector  $\boldsymbol{\mu}_{e1}$  to the right-hand side of Eqn. (1). When the phenotypic trait values are

245 multivariate normal, then for each individual in line  $i$  of generation  $j$  (0 or 1), the probability  
246 density function of the individual trait vector  $\mathbf{x}$  (which contains two trait values for each  
247 experiment) is

248

$$249 \quad f(\mathbf{x}) = (2\pi)^{-1} |\mathbf{P}_{i,j}|^{-1/2} \exp\left(-\frac{1}{2}(\mathbf{x} - \boldsymbol{\mu}_{i,j})^T \mathbf{P}_{i,j}^{-1}(\mathbf{x} - \boldsymbol{\mu}_{i,j})\right) \quad (2)$$

250

251 To calculate the likelihood of a dataset with observations in the base population and generation  
252 one, given a set of parameter values, the  $f(\mathbf{x})$  of all individuals in the dataset must be multiplied.  
253 Equation (2) can be used to model the dependence of trait values in generation one on trait  
254 values in generation zero by replacing  $\boldsymbol{\mu}_{i1}$  by Eqn. (1). This is a regression model. Using  
255 maximum likelihood techniques, we can then estimate the bivariate means  $\boldsymbol{\mu}_{i,0}$  and the variance  
256 components of  $\mathbf{P}_{i,j}$  per line per generation, and estimate  $\mathbf{G}_0$  and  $\mathbf{P}_0$  in the base population. The  
257 selection differentials act as observed covariates, and are not estimated in the ML model.

258 We compared models where common environmental effects,  $\boldsymbol{\mu}_{e1}$ , were included or excluded,  
259 and where  $\mathbf{P}$  remained fixed or was allowed to vary between selection lines or directions of  
260 selection. Since both the means and variances of the bivariate normal distribution can differ  
261 between these models, we used maximum likelihood instead of restricted maximum likelihood  
262 estimation of parameters (Verbeke & Molenberghs 1997). All ML fitting was done using R  
263 statistical software (Ihaka & Gentleman 1996). Although a disadvantage of ML is that the  
264 phenotypic variance estimates are biased downward, this estimation is asymptotically efficient

265 (Cox & Hinkley 1974). We obtained ML estimates of all model parameters and their  
266 approximate confidence intervals, based on the curvature of the likelihood function, or, for  
267 parameter estimates very near to the boundary of the parameter space, by direct profile  
268 likelihood intervals (Pawitan, 2001).

269 We used likelihood ratio tests to compare nested models. Since these tests are not available for  
270 non-nested models, we could only compare the AIC (Aikake Information Criterion, Akaike  
271 1973) between them. This kind of model comparison is not frequentist inference. As the AIC, we  
272 report twice the negative log-likelihood plus the number of parameters in the model. In model  
273 comparison, the model with the smallest AIC value is preferred. To ensure positive estimates of  
274 phenotypic variances, we used a log link function for parameterization. We checked normality  
275 assumptions by inspecting normal probability plots of residuals from the most parameter-rich  
276 models we fitted.

277

278 **Least squares estimates of  $\mathbf{G}$ .** The half-sib estimate of  $\mathbf{G}$  and the ML estimate of  $\mathbf{G}_0$  do not  
279 necessarily minimize the difference between actual and predicted response. To find the  $\mathbf{G}$  matrix  
280 minimizing the summed squared differences between predicted and actual selection response, we  
281 conducted a minimization routine assuming fixed  $\mathbf{P}$  and  $\mathbf{G}$  across generations and no  
282 environmental effects. As a measure of model fit, we calculated differences between predicted  
283 and actual response per line  $i$  and generation  $j$ ,  $\sum_{i,j}$  and then summed all the squared differences,  
284  $\sum_{i,j}^T \sum_{i,j}$ , across all selection lines (not including controls) and generations. This measure is a  
285 ‘residual sum of squares’ and we determined the  $\mathbf{G}$  minimizing it. This analysis did not include  
286 the four size lines that were selected in a new direction after the split at Gen9. Unlike the ML

287 estimate of  $\mathbf{G}_0$  (or the half-sib estimate), this least-squares estimate depends on trait values in all  
288 generations.

289

290 *Predicted versus actual responses to selection*

291

292 **Performance of different estimators.** After estimating the genetic variance-covariance matrix  
293 in three different ways, we used these estimates to predict selection responses in all subsequent  
294 generations and compared the fit of different models to the observed data. Eqn. (1) is easily  
295 extended to predict the response from one generation to the next by replacing the generation  
296 index 0 by  $j$  and 1 by  $j + 1$ .

297 As a starting point, we modeled selection response assuming: a) that  $\mathbf{G}$  did not change during  
298 each experiment (separate models incorporated either the ML estimate of  $\mathbf{G}_0$ , the half-sib  
299 estimates or the LS estimate); b)  $\mathbf{P}$  remained unchanged and identical to starting population  
300 values during the experiment; and c), no generation-specific environmental effects on mean trait  
301 values. The LS estimate of  $\mathbf{G}$  necessarily had to perform best among these models.

302 We attempted to improve model fit by modelling changes in  $\mathbf{P}$  and incorporating these in the  
303 predictions. The time- and line-dependent models we investigated assumed multivariate  
304 normality and used ML estimation of means and (co)variances (Eqn. 2). However, modeling  
305 phenotypic covariance matrices and using the resulting parameter estimates to predict selection  
306 response increased the residual sum of squares (i.e., reduced model fit). Simply substituting  
307 sample estimates of  $\mathbf{P}$  in Eqn. (1) also reduced model fit. Thus, the ‘best fit’ model for  $\mathbf{P}$  used in



308 subsequent steps was actually the one where  $\mathbf{P}$  was fixed at the estimate of the starting  
309 population (Gen0).

310

311 **Accounting for the effects of selection on  $\mathbf{G}$ .** Under the infinitesimal model, genetic variance  
312 components change due to gametic-phase linkage disequilibrium (Bulmer 1971; Lynch & Walsh  
313 1998). The expected change in the genetic variance-covariance matrix for selection line  $i$ , in  
314 generation  $j$  after selection, is

315

$$316 \quad \mathbf{G}_{i,j+1} - \mathbf{G}_{i,j} = \mathbf{G}_{i,j} \mathbf{P}_{i,j}^{-1} (\mathbf{P}_{i,j}^* - \mathbf{P}_{i,j}) \mathbf{P}_{i,j}^{-1} \mathbf{G}_{i,j} / 4, \quad (3)$$

317

318 where  $\mathbf{P}_{i,j}^*$  is the phenotypic variance among the individuals of line  $i$  in generation  $j$  selected to  
319 contribute to the next generation. The expected change in the genetic variance-covariance matrix  
320 due to this type of linkage disequilibrium was calculated for each selection line  $i$  and following  
321 each generation  $j$  of selection, and incorporated into equations to predict the selection response.  
322 We also modeled the  $\mathbf{P}_{i,j}^*$  and found that predictions were best when we used the sample  
323 statistics per generation. We compared the subsequent fit with the previous models where  $\mathbf{G}$  was  
324 assumed fixed.

325

326 **Variation in predictability and bias.** Because accuracy of predicted responses may differ  
327 among lines and traits, we checked for line-specific or direction-specific systematic differences

328 between predicted and actual selection responses (bias) and for line- or direction-specific  
329 changes in the variances of these differences (predictability). We also checked for the presence  
330 of common environmental effects on generation means, which are thus generation-specific  
331 biases.

332 We calculated differences between predicted and actual response,  $\sum_{i,j}$ , based on the best fit  
333 model achieved so far. To investigate line- or direction-specific bias and common environmental  
334 effects, we fitted repeated measurements models (Lindsey 1999) to the differences,  $\sum_{i,j}$ . We used  
335 the elliptic function of Lindsey's growth library (Lindsey 1999) with auto-correlated errors,  
336 normally distributed residuals, and changes in the variance of  $\sum_{i,j}$  between lines, and fit models  
337 to each trait separately. First, models included all effects (line-specific, direction-specific,  
338 common environment per generation) and were later simplified using backward model selection  
339 by means of likelihood ratio tests. Because autocorrelation was weak, we subsequently fit  
340 generalized least squares models using Venables and Ripley's (2002) GLS function and did  
341 model selection on these. A dependence of predictability on the direction of selection, as  
342 expected from other studies, was assessed by testing whether the variances of the differences  
343 varied significantly between lines or directions of selection, biases were investigated by testing  
344 whether certain averages differed significantly from zero. We examined the residual sums of  
345 squares again to determine to which extent models incorporating these line, direction or  
346 generation effects improved our ability to predict selection responses (i.e., reduced residual sum  
347 of squares). These analyses included all selection and control lines.

348

349 **Environmental effects.** It is customary to adjust selection responses with environmental effects  
350 estimated from control lines only. For that reason, we also estimated environmental effects using  
351 control lines alone and checked how much these reduced the residual sums of squares when they  
352 were incorporated in predictions of selection response.

353

354 *Changes in  $G$  between generations zero and nine of the size selection experiment*

355

356 To determine whether selection on eyespot size altered  $G$  between Gen0 and Gen9, we applied  
357 the same approach for estimating  $G_0$  (above) to estimate  $G$  in Gen9, using the four size selection  
358 lines that were re-split at Gen9 (the lines at Gen9 constitute the new ‘starting population’, and  
359 each line has two descendant lines following selection; see Fig. 2). Trait values for the base  
360 population (Gen0), Gen1, a given (split) population in Gen9 and its offspring in Gen10 were  
361 combined in a single model fit. This allowed us to directly estimate the differences between  
362 components of  $G$  in the base population and a given descendant population in Gen9.

363 For each selection line, we fitted a model that allowed changes in all three parameters of  $G$  and  
364 sub- models that allowed from none to two parameters of  $G$  to change. The models for each line  
365 also included global environmental effects on character means estimated for Gen10 and line-  
366 specific changes in the phenotypic variance between Gen9-Gen10 (see above). We again used  
367 likelihood ratio tests to compare nested models with different numbers of parameters, and the  
368 AIC to compare models with equal numbers of parameters (e.g., to compare two models that  
369 each included one parameter change in  $G$ ). In this way, we selected a model that best described

370 the changes in  $\mathbf{G}$  for the empirical data; these changes were not constrained to follow the patterns  
371 predicted by the infinitesimal model (Eqn. 3). We then compared our estimated changes in  $\mathbf{G}$   
372 between Gen0-Gen9 with predicted changes according the infinitesimal model (Eqn. 3).

373 As a final investigation of the potential changes in  $\mathbf{G}$ , we followed-up on a suggestion detailed  
374 by Le Rouzic et al. (2011) that local acceleration or deceleration of selection responses  
375 unexplained by the breeder's equation can be caused by changes in the local curvature of the  
376 genotype-phenotype map. We thus fitted bivariate generalized additive models (gam, Wood  
377 2017) to prediction errors per trait remaining when environmental effects are accounted for. This  
378 is different from our analysis of predictability and bias in that we don't test for differences in bias  
379 between lines but for local bias variation across trait space. For gam's where thin plate regression  
380 splines of average anterior and posterior eyespot size in the population had significant effects on  
381 the prediction error, we made contour plots of the pattern of model predictions to see whether the  
382 starting population and the populations with secondary splittings were situated at trait values  
383 close to contours with positive (augmented response) or negative (lagging response) values. If  
384 that is the case, directional epistasis might cause  $\mathbf{G}$  to change.

385

## 386 **RESULTS**

387

### 388 Estimates of $\mathbf{G}$

389

390 **Outbred laboratory stock population.** Substantial additive genetic variances ( $V_A$ ), covariances,  
 391 and genetic correlations ( $r_G$ ) for eyespot size and color composition were detected in the  
 392 unselected stock population using paternal half-sib analysis (Table 1). Because observed sire  
 393 variances were consistently larger than dam variances (Table 1) we report both estimates  
 394 separately and make separate predictions using sire and dam genetic variance (see below).  
 395 However, the standard error of half-sib estimates are relatively large compared to estimates  
 396 obtained from the selection data (see below), and the sire and dam variances were not  
 397 significantly different in a likelihood ratio test ( $\chi^2 = 6.80$ ,  $df = 10$ ,  $p = 0.744$ ).

398

399 Table 1. Estimates of the variance-covariance matrix  $G$  used to predict selection response.

| Population                     | Size          |               |             | Color composition |               |                       | Method |
|--------------------------------|---------------|---------------|-------------|-------------------|---------------|-----------------------|--------|
|                                | $V_A$<br>EyeA | $V_A$<br>EyeP | $r_G$       | $V_A$<br>Eye4     | $V_A$<br>Eye6 | $r_G$                 |        |
| <b>Unselected Stock (sire)</b> | 20.7 (6.4)    | 55.1 (14.7)   | 0.69 (0.13) | 9.7 (4.1)         | 15.1 (4.0)    | 0.71 (0.15)           | REML   |
| <b>Unselected stock (dam)</b>  | 15.4 (5.3)    | 30.4 (10.6)   | 0.41 (0.24) | 6.8 (4.3)         | 4.1 (3.0)     | 0.78 (0.34)           | REML   |
| <b>Gen0</b>                    | 17.3 (1.0)    | 30.0 (1.5)    | 0.56 (0.03) | 5.4 (0.8)         | 4.4 (0.7)     | 1.00<br>(0.83 - 1.00) | ML     |
| <b>Gen0 (constant)</b>         | 17.4 (0.6)    | 29.0 (1.9)    | 0.57 (0.02) | 4.9 (0.6)         | 3.8 (0.4)     | 0.78 (0.07)           | LS     |
| <b>Gen0 (updated)</b>          | 19.3 (0.7)    | 37.1 (2.8)    | 0.72 (0.03) | 5.8 (0.8)         | 4.7 (0.6)     | 0.81 (0.06)           | LS     |

400 The estimates obtained from the unselected stock also included (four) pairwise genetic correlations between eyespot  
 401 size and color composition traits, which are not reported here.

402  **$G_0$  in the starting population.** The details of ML model selection and parameter predictions for  
403 Gen0 are given in Table 2 (eyespot size) and Table 3 (eyespot color composition). The best fit  
404 model for both data sets included global (common to all lines) environmental effects which  
405 changed phenotype means between Gen0 and Gen1 (Tables 2 and 3): After one generation of  
406 selection, there was a positive environmental effects on the size of eyespots EyeA and EyeP  
407 (Table 2; Mean environmental effect), and a negative environmental effect on the relative  
408 blackness of eyespot Eye4 (Table 3; Mean environmental effect). For the eyespot size dataset,  
409 the best-fit model incorporated changes in phenotypic variances and covariances that were  
410 specific to each direction of selection (but without any obvious pattern of change related to the  
411 direction; Table 2). Model fit was poorer (higher AIC values) when models incorporated either  
412 line-specific changes in P or differentiated between groups of antagonistic and concerted  
413 selection lines. For the color composition dataset, in contrast, the best fit model incorporated a  
414 global change in P across all lines between Gen0 and Gen1 (Table 3).

415 The ML genetic parameter estimates for Gen0 were similar across all models (Tables 2 & 3: see  
416 parameter estimates for ML models I, II, and III); thus, model selection did not appear to bias  
417 estimates. For the best fit models, the estimated genetic correlation between eyespots EyeA and  
418 EyeP =  $0.56 \pm 0.02$ , and the estimated genetic correlation between eyespots Eye4 and Eye6 = 1.0  
419 (profile likelihood confidence interval = 0.83 – 1.00).

420

421 **Least squares estimates.** For each dataset, we calculated a least-squares (realized) estimate of  $G$   
422 (Table 1) that minimized the summed squared differences between predicted and actual selection  
423 response, across all generations. In general, the least-squares estimates are concordant with ML

424 Table 2. Maximum likelihood parameter estimates for the starting population and first offspring  
425 generation in the eyespot size selection experiment.

| Eyespot Size                            | ML Model I             | ML Model II            | ML Model III               |
|-----------------------------------------|------------------------|------------------------|----------------------------|
| AIC                                     | 47448                  | 47230                  | <b>47184</b>               |
| Number of Parameters                    | 11                     | 13                     | <b>40</b>                  |
| Generation 0                            |                        |                        |                            |
| Mean EyeA                               | 26.3 (0.1)             | 26.3 (0.1)             | <b>26.3 (0.1)</b>          |
| Mean EyeP                               | 57.3 (0.1)             | 57.3 (0.1)             | <b>57.3 (0.1)</b>          |
| $V_G$ EyeA                              | 17.8 (1.0)             | 17.0 (1.0)             | <b>17.3 (1.0)</b>          |
| $V_G$ EyeP                              | 30.6 (1.6)             | 30.4 (1.5)             | <b>30.0 (1.5)</b>          |
| $r_G$ (EyeA, EyeP)                      | 0.57 (0.03)            | 0.57 (0.03)            | <b>0.56 (0.03)</b>         |
| Generation 1                            |                        |                        |                            |
| Mean Environmental effect EyeA          | 0                      | 2.2 (0.1)              | <b>2.2 (0.1)</b>           |
| Mean Environmental effect EyeP          | 0                      | 1.4 (0.2)              | <b>1.5 (0.2)</b>           |
| Modeled changes in phenotypic variances | Shared among all lines | Shared among all lines | Per direction of selection |

426  
427 Estimates of character means, genetic variances ( $V_G$ ), genetic correlations ( $r_G$ ), and their standard errors (in  
428 parenthesis) are given for Generation 0, the starting population before selection. Estimates are given for each of  
429 three ML models: Model I, the model with the fewest parameters, no common environmental effect, and all lines  
430 share a common change in phenotypic variance between Gen0 and Gen1; Model II, the model with the fewest  
431 parameters plus a common environmental effect; Model III is the model with the lowest AIC among all models. It  
432 allows changes in phenotypic variances between generations. Estimates from the overall best fit model are in bold.



433 estimates and fall within their range of expected error (compare to estimates in Tables 2 & 3);  
434 however, the estimate for the genetic correlation for color composition of Eye4 and Eye6 ( $r_G =$   
435  $0.78 \pm 0.07$ ) is slightly lower than the ML estimate.

436

437 *Predicted versus observed responses to selection*

438

439 **Performance of different estimators.** Table 4 shows the sums of squared differences (residual  
440 sum of squares; RSS) between predicted and actual responses to selection under a number of  
441 different model conditions. As a measure of global model fit (all lines, all generations, per  
442 dataset), we compared these residual sums of squares to the total sum of squared differences  
443 between the actual responses per line per generation and the overall mean. First we held  $\mathbf{G}$  and  $\mathbf{P}$   
444 constant and did not include environmental effects. The sire (REML) estimate of  $\mathbf{G}$  in the stock  
445 population produced the largest mismatch between predicted and observed responses (the largest  
446 RSS, Table 4): 3.4% of the total sums of squares for the eyespot size data, and 17.4% of the total  
447 for the color composition data. The dam (REML) estimate of  $\mathbf{G}$  substantially increased model fit  
448 relative to the sire estimate in both experiments (Table 4). Both the ML estimate of  $\mathbf{G}_0$  and the  
449 LS estimate (realized  $\mathbf{G}$ ) produced slight improvements over the dam estimate (Table 4, both  
450 datasets). The smallest residual sum of squares for eyespot size under the basic conditions is  
451 1.6% of the total (LS estimate; Table 4); it is 6.4% of the total for eyespot color composition (LS  
452 estimate; Table 4).

453

454 Table 3. Maximum likelihood parameter estimates for the starting population and first offspring  
 455 generation in the eyespot color composition selection experiment.

| Eyespot Color Composition               | ML Model I                    | ML Model II                         | ML Model III                  |
|-----------------------------------------|-------------------------------|-------------------------------------|-------------------------------|
| AIC                                     | 25225                         | <b>25209</b>                        | 25219                         |
| Number of Parameters                    | 11                            | <b>13</b>                           | 28                            |
| Generation 0                            |                               |                                     |                               |
| Mean Eye4                               | 72.3 (0.1)                    | <b>72.3 (0.1)</b>                   | 72.8 (0.1)                    |
| Mean Eye6                               | 71.3 (0.1)                    | <b>71.3 (0.1)</b>                   | 71.3 (0.1)                    |
| $V_G$ Eye4                              | 5.4 (0.8)                     | <b>5.4 (0.8)</b>                    | 5.5 (0.8)                     |
| $V_G$ Eye6                              | 4.4 (0.7)                     | <b>4.4 (0.7)</b>                    | 4.5 (0.7)                     |
| $r_G$ (Eye4, Eye6)                      | 1.00 (0.80-1.00) <sup>†</sup> | <b>1.00 (0.83-1.00)<sup>†</sup></b> | 1.00 (0.78-1.00) <sup>†</sup> |
| Generation 1                            |                               |                                     |                               |
| Mean Environmental effect Eye4          | 0                             | <b>-0.69 (0.17)</b>                 | -0.67 (0.17)                  |
| Mean Environmental effect Eye6          | 0                             | <b>0.004 (0.16)</b>                 | 0.0001 (0.16)                 |
| Modeled changes in phenotypic variances | Shared among all lines        | Shared among all lines              | Per direction of selection    |

456  
 457 Estimates of character means, genetic variances ( $V_G$ ), genetic correlations ( $r_G$ ), and their standard errors (in  
 458 parenthesis) are given for Generation 0, the starting population before selection. Estimates are given for each of  
 459 three ML models: Model I, the model with the fewest parameters, no common environmental effect, and all lines  
 460 sharing a common change in phenotypic variance between Gen0 and Gen1. Model II is the model with the fewest  
 461 parameters plus a common environmental effect. It is the model with the lowest AIC among all models. Model III is  
 462 allowing changes in phenotypic variances between generations. Estimates from the overall best fit model are in bold.

463 <sup>†</sup>Direct profile confidence interval for the ML estimate of  $r_G$

464

465 **Accounting for the effects of selection on  $G$ .** In general, adjusting  $G$  each generation to account  
466 for linkage disequilibrium generated by selection (according to Eqn. 3) did not affect model fit  
467 relative to constant  $G$ . For the size dataset, the residual sums of squares increased when  $G$  was  
468 allowed to change across generations (Table 4: LS updated, RSS = 571.06; LS fixed, RSS =  
469 490.18). For the color composition dataset, accounting for changes in  $G$  due to linkage  
470 disequilibrium slightly improved model fit but only reduced RSS by ~1% relative to models with  
471 constant  $G$  (Table 4: LS updated, RSS = 81.82; LS fixed, RSS = 82.65).

472

473 **Variation in predictability and bias.** We found that the predictability of actual selection  
474 responses differed between individual selection lines in both datasets. Predictability of selection  
475 response also differed between eyespots within an experiment. In the size dataset, predictability  
476 of the selection response of EyeA varied significantly between directions of selection  
477 (heterogeneity of error variances: LRT = 43.62,  $df = 14$ ,  $p < 0.001$ ), but this could not be  
478 simplified by grouping concerted and antagonistic directions (LRT = 18.78,  $df = 2$ ,  $p < 0.001$ ).  
479 Predictability of EyeA response appeared to vary between different directions of selection: lines  
480 in the A-P+ direction had the largest error variances and the A+P- and A+P+ lines (see Figure 3)  
481 had the smallest error variance (<10% of the largest line-specific error variance). Overall,  
482 predictability of the response of EyeP was not significantly different between selection lines  
483 (LRT = 19.18,  $df = 14$ ,  $p = 0.16$ ). We therefore did not find any evidence that as a group,  
484 predictability differed between concerted and antagonistic selection lines in this experiment.

485

486 Table 4. Unexplained variation in the predicted response to selection.

| Residual sum of squares   | Total sum of squares | $G$                   | Environmental effects |
|---------------------------|----------------------|-----------------------|-----------------------|
| Eyespot size              | 29059                |                       |                       |
| 523.66                    |                      | Fixed; REML (dam)     | Not included          |
| 986.35                    |                      | Fixed; REML (sire)    | Not included          |
| 491.23                    |                      | Fixed; ML ( $G_0$ )   | Not included          |
| 490.18                    |                      | Fixed; LS             | Not included          |
| 602.47                    |                      | Updated; ML ( $G_0$ ) | Not included          |
| 571.06                    |                      | Updated; LS           | Not included          |
| 289.31                    |                      | Fixed; LS             | Included              |
| 388.81                    |                      | Updated; LS           | Included              |
| Eyespot color composition | 1287                 |                       |                       |
| 85.85                     |                      | Fixed; REML (dam)     | Not included          |
| 224.10                    |                      | Fixed; REML (sire)    | Not included          |
| 86.65                     |                      | Fixed; ML ( $G_0$ )   | Not included          |
| 82.65                     |                      | Fixed; LS             | Not included          |
| 83.29                     |                      | Updated; ML ( $G_0$ ) | Not included          |
| 81.82                     |                      | Updated; LS           | Not included          |
| 39.30                     |                      | Fixed; LS             | Included              |
| 38.02                     |                      | Updated; LS           | Included              |

487

488 Residual sums of squares for each model were calculated from the differences between predicted and actual  
 489 response per line per generation, summed over all selection lines and generations in each experiment. Total sums  
 490 of squares were calculated from the sums of squared differences between actual responses per line per generation  
 491 and the overall mean. Estimates of  $G$  were either fixed at starting population values or updated to account for  
 492 linkage disequilibrium, according to Eqn. (3). When estimating  $G$  using LS methods, predictions of selection  
 493 response can include global environmental effects. The values of these effects are given in Table 5. See text for  
 494 details of model fitting procedures.

495

496 In the color composition dataset, predictability of the selection response varied significantly  
497 between lines for Eye6 (LRT = 18.52,  $df = 9$ ,  $p = 0.03$ ) but not Eye4 (LRT = 11.38,  $df = 9$ ,  $p =$   
498 0.25). The predictability of selection responses did not vary between selection directions, and did  
499 not differ between concerted and antagonistic selection lines. Concerted lines 4B6B<sub>2</sub>, and 4G6G<sub>2</sub>  
500 and the antagonistic line 4G6B<sub>2</sub> (see Figure 2), had the smallest error variance (each line with <  
501 20% of the largest line-specific error variance) and the concerted line 4B6B<sub>1</sub> had the largest error  
502 variance. Despite the fact that individual lines differed in the predictability of selection response,  
503 the per-line average errors were not significantly different from zero in either the size or color  
504 experiment. This means that responses were never consistently over- or underestimated in any of  
505 the selection lines or selection directions and there were no significant line biases in the  
506 responses of concerted versus antagonistic lines.

507

508

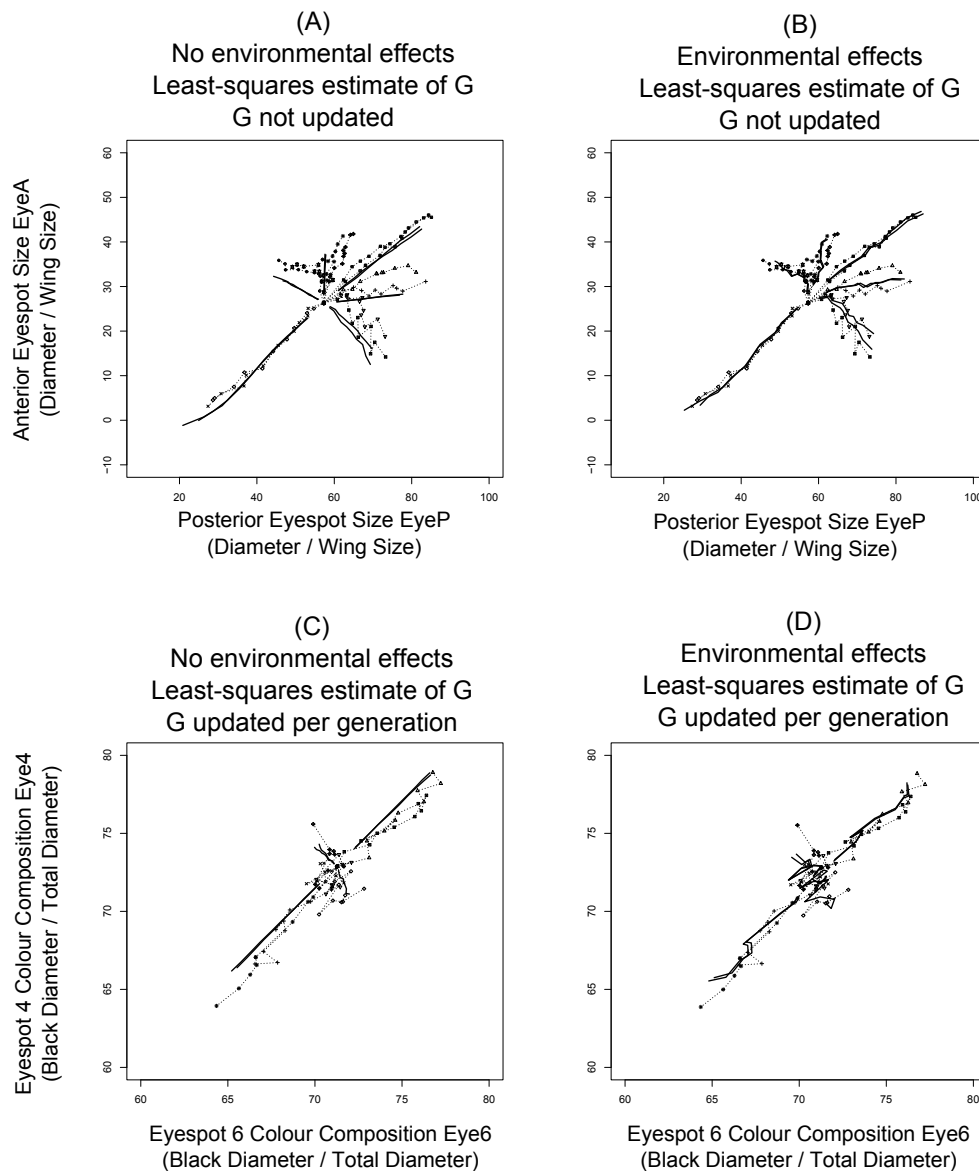

**Figure 3.** Including environmental effects improves the correspondence between predicted and observed responses to artificial selection. Predicted responses (solid lines) and observed selection responses (dashed lines connecting data points) are shown for each replicate in each selected direction. For each experiment, we show the best fit model without environmental effects included (**A** and **C**), and the best fit model with environmental effects included (**B** and **D**). For eyespot size (**A** and **B**),  $G$  is fixed at starting values. For eyespot color composition, the least-squares estimate of  $G$  was updated each generation to account for the effects of selection on genetic variances and covariances. See Table 4 for details of the model fitting and choice of the best fit model in each experiment.

528 **Environmental effects.** We found significant common environmental effects on eyespot  
529 phenotype means within generations and across all lines for both datasets (all  $p < 0.0001$  Table  
530 5). Environment affected the mean size of EyeA and EyeP, and the mean color composition of  
531 Eye4 and Eye6 independent of the effects of selection (also see above and Tables 2 and 3).  
532 Incorporating common environmental effects into our predictions for selection responses in each  
533 dataset visibly improved the correspondence between predicted and actual response (Figs. 3d,  
534 4d) and substantially reduced the residual sums of squares experiments (size: to 289.31, a 41%  
535 reduction; color composition: to 38.02, a 54% reduction; Table 4).

536 When we used only the unselected control (UC) lines to estimate the between-line, within-  
537 generation environmental effects, the only significant global environmental effects were for  
538 EyeA in Gen1 and Gen6. This method did not reveal any significant common environmental  
539 effects on EyeP, Eye4, or Eye6 in any generation. Despite this, incorporating environmental  
540 effects estimated from the UC lines still substantially improved the correspondence between  
541 predicted and actual responses to selection (sum of squared differences = 359.21, and 55.00 for  
542 eyespot size and color composition, respectively; Table 4) relative to models that did not  
543 incorporate environmental effects.

544

#### 545 *Changes in $G$ between generations zero and nine of the size selection experiment*

546

547 A subset of the size selection lines was used to estimate changes in genetic variances and  
548 covariances between Gen0 and Gen9. We detected significant changes in  $G$  in two of the



549 Table 5. Global environmental effects estimated for the eyespot size and color composition selection  
550 experiments.

| <b>SIZE</b>              |                              |                              |
|--------------------------|------------------------------|------------------------------|
| Generation               | EyeA Environmental effect    | EyeP Environmental effect    |
| 1                        | <b>2.10 (1.70 - 2.50)</b>    | <b>1.31 (0.70 - 1.93)</b>    |
| 2                        | <b>0.93 (0.53 - 1.33)</b>    | <b>1.17 (0.56 - 1.79)</b>    |
| 3                        | 0.02 (-0.38 - 0.42)          | 0.12 (-0.49 - 0.74)          |
| 4                        | 0.19 (-0.21 - 0.59)          | <b>1.20 (0.59 - 1.82)</b>    |
| 5                        | 0.29 (-0.11 - 0.69)          | <b>-0.72 (-1.33 - -0.11)</b> |
| 6                        | <b>-1.09 (-1.49 - -0.69)</b> | -0.10 (-0.71 - 0.51)         |
| 7                        | <b>0.74 (0.34 - 1.14)</b>    | 0.07 (-0.55 - 0.68)          |
| 8                        | 0.19 (-0.59 - 0.21)          | 0.11 (-0.73 - 0.50)          |
| 9                        | <b>0.66 (0.26 - 1.07)</b>    | 0.29 (-0.33 - 0.90)          |
| 10                       | -0.25 (-0.65 - 0.15)         | <b>1.21 (0.60 - 1.83)</b>    |
| <b>Color composition</b> | Eye4 Environmental effect    | Eye6 Environmental effect    |
| 1                        | <b>-0.72 (-1.18 - -0.26)</b> | -0.28 (-0.64 - 0.09)         |
| 2                        | 0.45 (-0.01 - 0.91)          | <b>0.57 (0.20 - 0.93)</b>    |
| 3                        | -0.02 (-0.48 - 0.44)         | -0.25 (-0.62 - 0.11)         |
| 4                        | <b>-1.13 (-1.59 - -0.66)</b> | <b>-1.34 (-1.71 - -0.98)</b> |
| 5                        | <b>0.57 (0.11 - 1.04)</b>    | <b>0.84 (0.48 - 1.20)</b>    |
| 6                        | 0.06 (-0.41 - 0.52)          | <b>0.67 (0.31 - 1.04)</b>    |
| 7                        | 0.26 (-0.20 - 0.72)          | 0.03 (-0.33 - 0.40)          |
| 8                        | -0.37 (-0.83 - 0.10)         | -0.19 (-0.55 - 0.18)         |
| 9                        | 0.32 (-0.14 - 0.78)          | <b>-0.46 (-0.83 - -0.10)</b> |

551  
552 Global environmental effects estimated across all lines, per generation, for eyespot size and eyespot color  
553 composition experiments. Environmental effects on each eyespot were estimated using all lines, including  
554 unselected controls (see Methods). Estimates are shown with their 95% confidence intervals in parentheses. Values  
555 in bold indicate environmental effects for which the confidence interval does not include zero.

556 stabilizing-directional lines, and a trend in a third line (Table 6). In these three lines, the best fit  
557 model (lowest AIC) included a change in at least one parameter of  $\mathbf{G}$ . However, the parameter  
558 estimates themselves are highly model dependent. Estimates change drastically depending on the  
559 particular model (Table 6). Therefore individual estimates must be interpreted with caution.  
560 Regardless of model, in all cases where we detected significant changes in  $\mathbf{G}$ , the estimated  
561 change differed from predicted change (according to Eqn. 3) by at least one standard error (Table  
562 6).

563

564 We also applied Eqn. 3 to all lines in both datasets to predict changes in  $\mathbf{G}$  due to selection-  
565 induced linkage disequilibrium between Gen0-Gen9 (Table 7). We found that the smallest  
566 changes due to linkage disequilibrium were predicted in the two stabilizing-directional selection  
567 lines (eyespot size) which were re-split at Gen9 (Table 6), and in antagonistic selection lines for  
568 size and color composition. In both datasets, Eqn. 3 predicted the largest changes in  $\mathbf{G}$  for  
569 concerted selection lines. Unfortunately, stabilizing-directional lines (with the smallest predicted  
570 changes) were the only lines re-split at Gen9 and available to test actual changes in  $\mathbf{G}$ .

571 Even while we could not demonstrate significant bias differences between selection lines,  
572 generalized additive models of prediction errors for anterior and posterior eyespot size depended  
573 significantly on average values of these two traits in the population (eyeA approximate  
574 significance of smooth terms  $F_{16.7, 21.4} = 1.756, p = 0.028$ ; eyeP:  $F_{13.4, 17.7} = 2.489, p = 0.0015$ ).  
575 Figure 4 shows that the local bias is relatively small, which can explain that we did not detect it

576

577 Table 6. Predicted changes in  $G$  according to the infinitesimal model, versus changes in  $G$  estimated from  
 578 eyespot size selection lines after nine generations of selection.

| Selection line | Parameter             | ML Model (i)<br>Estimated change<br>(S.E.) | ML Model (ii)<br>Estimated change<br>(S.E.) | ML Model (iii)<br>Estimated change<br>(S.E.) | Infinitesimal<br>model<br>Predicted<br>change |
|----------------|-----------------------|--------------------------------------------|---------------------------------------------|----------------------------------------------|-----------------------------------------------|
| A= P+ (1)      | $V_A$ EyeA            | 7.20 (2.81)                                | 0                                           | 0                                            | -8.63 (0.59)                                  |
|                | $V_A$ EyeP            | -9.53 (4.33)                               | -13.60 (4.35)                               | 0                                            | -17.33 (2.45)                                 |
|                | $r_G$ (EyeA,<br>EyeP) | 0.03 (0.07)                                | 0                                           | 0                                            | -0.10 (0.004)                                 |
|                | AIC                   | 50436.52                                   | 50433.70                                    | 50437.26                                     |                                               |
|                |                       |                                            | $P = 0.02$                                  |                                              |                                               |
| A= P+ (2)      | $V_A$ EyeA            | -2.33 (4.37)                               | 54.89 (5.10)                                | 0                                            | -5.14 (0.56)                                  |
|                | $V_A$ EyeP            | -1.54 (4.11)                               | 21.80 (4.66)                                | 0                                            | -17.30 (2.47)                                 |
|                | $r_G$ (EyeA,<br>EyeP) | -0.66 (0.14)                               | 0                                           | 0                                            | -0.17 (0.01)                                  |
|                | AIC                   | 50723.16                                   | 50721.14                                    | 50730.20                                     |                                               |
|                |                       |                                            | $P < 0.001$                                 |                                              |                                               |
| A+ P= (1)      | $V_A$ EyeA            | 4.54 (2.57)                                | 0                                           | 0                                            | -10.02 (0.63)                                 |
|                | $V_A$ EyeP            | -2.19 (5.14)                               | -15.22 (5.02)                               | 0                                            | -14.69 (2.09)                                 |
|                | $r_G$ (EyeA,<br>EyeP) | 0.19 (0.06)                                | 0                                           | 0                                            | -0.09 (0.01)                                  |
|                | AIC                   | 50569.18                                   | 50566.12                                    | 50567.38                                     |                                               |
|                |                       |                                            | $P = 0.07$                                  |                                              |                                               |
| A+ P= (2)      | $V_A$ EyeA            | -4.99 (2.91)                               | 0                                           | 0                                            | -9.91 (0.62)                                  |
|                | $V_A$ EyeP            | 1.24 (4.22)                                | 0                                           | 0                                            | -15.96 (2.26)                                 |
|                | $r_G$ (EyeA,<br>EyeP) | 0.10 (0.08)                                | 0                                           | 0                                            | -0.08 (0.01)                                  |
|                | AIC                   | 50063.54                                   | 50061.30                                    | 50061.30                                     |                                               |
|                |                       |                                            | $P = 1.00$                                  |                                              |                                               |

579 Changes in  $G$  between the base population (Gen0) and Gen9 were estimated from the subset of size selection lines which were  
 580 split at Gen9 and their descendants after one additional generation of selection. ML models either allowed all components of  $G$  to  
 581 change, or constrained successive components of  $G$  to no change between Gen0-Gen9. Estimates (with their standard errors) and  
 582 the associated AIC are given for three models: (i) the model with unconstrained  $G$ ; (ii) the model with minimum AIC among all  
 583 models fitted; (iii) the model with all changes constrained to zero. Predicted changes in  $G$  between Gen0-Gen9 according to the  
 584 infinitesimal model, accounting for linkage disequilibrium, were calculated according to Eqn (3). P values are for likelihood ratio  
 585 tests comparing the model without any change (iii) with the model with minimum AIC among all models fitted (ii). The standard  
 586 deviation of the infinitesimal model predicted change was obtained as follows. The matrix  $G$  was re-estimated for each  
 587 combination of lines which still included all selection directions. The predicted change was recalculated for each estimated  
 588 matrix. The standard deviation of each prediction over the combinations is given.

589

590 Table 7. Infinitesimal predictions for genetic parameters at Generation 9 of the eyespot size and color  
591 composition experiments.

| <b>Color composition selection: Eyespots EyeA, EyeP</b> |                           |                           |                      |
|---------------------------------------------------------|---------------------------|---------------------------|----------------------|
| <b>Line</b>                                             | <b>V<sub>A</sub> EyeA</b> | <b>V<sub>A</sub> EyeP</b> | <b>r<sub>G</sub></b> |
| A= P+ (1)                                               | 8.80                      | 11.70                     | 0.47                 |
| A= P+ (2)                                               | 12.29                     | 11.73                     | 0.40                 |
| A-P- (1)                                                | 17.80                     | 23.14                     | -0.10                |
| A-P- (2)                                                | 16.00                     | 24.36                     | -0.07                |
| A-P+ (1)                                                | 12.37                     | 12.59                     | 0.51                 |
| A-P+ (2)                                                | 16.20                     | 13.25                     | 0.54                 |
| A+P= (1)                                                | 7.41                      | 14.33                     | 0.48                 |
| A+P= (2)                                                | 7.52                      | 13.07                     | 0.49                 |
| A+P- (1)                                                | 8.23                      | 14.62                     | 0.59                 |
| A+P- (2)                                                | 8.25                      | 14.92                     | 0.58                 |
| A+P+ (1)                                                | 7.98                      | 13.05                     | 0.47                 |
| A+P+ (2)                                                | 8.07                      | 13.62                     | 0.46                 |
| UC (1)                                                  | 14.14                     | 27.40                     | 0.48                 |
| UC (2)                                                  | 22.88                     | 22.66                     | 0.52                 |
| UC (3)                                                  | 17.14                     | 32.28                     | 0.60                 |
| <b>Color composition selection: Eyespots Eye4, Eye6</b> |                           |                           |                      |
| <b>Line</b>                                             | <b>V<sub>A</sub> Eye4</b> | <b>V<sub>A</sub> Eye6</b> | <b>r<sub>G</sub></b> |
| 4B6B (1)                                                | 3.53                      | 2.92                      | 0.71                 |
| 4B6B (2)                                                | 3.55                      | 2.90                      | 0.69                 |
| 4G6G (1)                                                | 3.90                      | 3.09                      | 0.71                 |
| 4G6G (2)                                                | 3.87                      | 3.23                      | 0.73                 |
| 4B6G (1)                                                | 4.63                      | 3.81                      | 0.79                 |
| 4B6G (2)                                                | 4.69                      | 3.81                      | 0.80                 |
| 4G6B (1)                                                | 6.15                      | 4.93                      | 0.82                 |
| 4G6B (2)                                                | 4.94                      | 4.03                      | 0.81                 |
| 4U6C (1)                                                | 6.05                      | 4.98                      | 0.82                 |
| 4U6C (2)                                                | 5.46                      | 4.45                      | 0.80                 |

592  
593 Predicted values for genetic variance, covariance, and genetic correlations for each selection line, at Generation 9.  
594 Estimates were obtained by applying the overall best-fit model for  $G$ , and by updating  $G$  each generation according  
595 to Eqn. 3.

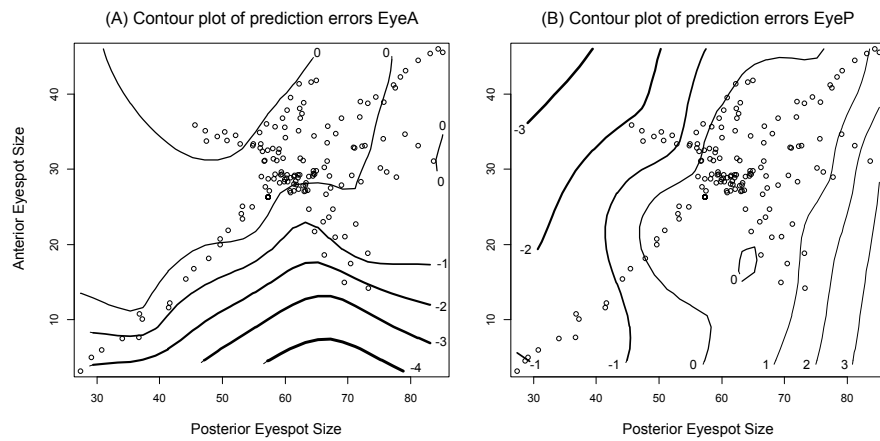

**Figure 4.** Contour plots of prediction errors in anterior (A) and posterior (B) eyespot sizes, when shared environmental effects are accounted for. For each trait, the prediction error increases on average with the value of the trait. Such an asymmetric pattern suggests that directional epistasis in the genotype-phenotype map could be present for both traits, and that the effect is that the trait variance positively depends on trait value.

597 when selection lines were analyzed as categorical variables. Assuming that directional epistasis  
598 causes the pattern, the contour plots of these models (Figure 4) suggest that genotypic trait  
599 variances increase with trait means. In comparison with the ancestral population, for example,  
600 A=P+ populations then have an increased genetic variance for eyeP.

601

## 602 **DISCUSSION**

603

604 We were able to evaluate the predictive power of the breeder's equation for two correlated traits  
605 using two large artificial selection experiments targeting correlated sets of eyespot characters in  
606 *B. anynana* butterflies. Although the standard infinitesimal model predicted evolutionary  
607 responses with reasonable accuracy, predictability varied between size and color composition,  
608 between individual selection lines within an experiment, and between individual eyespots.  
609 Accounting for selection-induced changes in  $\mathbf{G}$  (due to linkage disequilibrium, Bulmer 1971) had  
610 little, if any, effect on the accuracy of our predictions. Instead we found that accounting for  
611 common environmental effects on eyespot phenotypes that were independent of selection  
612 significantly improved the correspondence between predicted and observed evolutionary changes  
613 in eyespot size and color composition. Using a subset of the data, we detected significant  
614 changes in parameters of  $\mathbf{G}$  after nine generations of artificial selection. These were not in  
615 agreement with predictions from the breeder's equation.

616

617 *Analyzing selection responses in non-pedigreed populations*

618

619 When pedigree information is available, restricted maximum likelihood (REML) analysis  
620 combined with mixed-model analysis of all phenotypic data is used to estimate  $\mathbf{G}_0$  in the base  
621 (starting) population (Sorensen and Kennedy 1984). Lacking a pedigree during the selection  
622 experiment, we were still able to estimate  $\mathbf{G}_0$  in two different ways. First we used REML mixed  
623 model analysis of a half-sib breeding design to estimate  $\mathbf{G}$  in the unselected stock population.  
624 Second, we constructed ML models to estimate  $\mathbf{G}_0$ , the additive genetic variance-covariance  
625 matrix in the starting population prior to selection, for both the eyespot size and color  
626 composition experiments. Inspecting sums of squares of the residuals of predicted selection  
627 response allowed us to assess whether the stock population estimate of  $\mathbf{G}$  (dam estimate) or  $\mathbf{G}_0$   
628 better predicted selection responses across all generations. We found that  $\mathbf{G}_0$  performed better  
629 than the stock population estimate, though both estimates provided reasonably accurate  
630 predictions for the magnitude and direction of selection response in each experiment.

631 We used the same ML approach to re-estimate  $\mathbf{G}$  later in the experiment, using four size  
632 selection lines that were split into sub-lines at Generation 9 and subject to an additional  
633 generation of selection. These data were used to investigate whether significant changes in  $\mathbf{G}$   
634 occurred during the course of the selection experiment. Although we detected significant  
635 changes in  $\mathbf{G}$  with this method, parameter estimates of the changes were much less reliable than  
636 our initial ML estimation of  $\mathbf{G}_0$  in the starting population. For the starting population, confidence  
637 intervals of all estimates were relatively narrow and the estimates themselves were not affected  
638 by model selection bias (Tables 2 and 3). In contrast, we found strong model selection bias in our

639 Gen9 estimates of  $\mathbf{G}$ . Thus it appears that the ML approach we used works well when many lines  
640 are started from a single ancestral population and selected in many different directions- the  
641 situation that occurred at the onset of both experiments. Our approach is less robust when a  
642 small number of lines are started from an ancestral line and selection proceeds in a few limited  
643 directions (which occurred during Gen9). An additional disadvantage of our method is that the  
644 assumptions of the breeder's equation may not be satisfied after many generations of selection,  
645 when  $\mathbf{G}$  is expected to change substantially through changes in allele frequencies (Turelli &  
646 Barton 1994). However, that disadvantage applies to all approaches involving the breeder's  
647 equation and does not specifically distinguish our procedure. Simulations are needed to fully  
648 assess the power and precision of ML estimates of  $\mathbf{G}$  and their dependence on the design of  
649 selection experiments. However, our approach is advantageous in that it is not computationally  
650 demanding, and in addition, in that the experimental design allowed direct tests for changes in  $\mathbf{G}$   
651 across generations not assuming any particular mechanism.

652

653 *Does the breeder's equation predict bivariate responses to selection accurately?*

654

655 The standard model adequately predicts the direction of evolutionary change for both eyespot  
656 size and color composition. This result is perhaps unsurprising- the standard model appears  
657 generally robust, even when infinitesimal assumptions are violated (Turelli & Barton 1994;  
658 Zhang and Hill 2005). The concordance we found between three separate estimates for  $\mathbf{G}$   
659 (REML dam estimate of the unselected stock population; ML estimate for the base population in  
660 each experiment; and the LS estimate across all generations of selection), and that fact that all



661 three produced reasonable predictions for short term change (excepting the REML sire estimates;  
662 Table 1) suggests that infinitesimal assumptions are reasonable for both datasets. Although  
663 estimates of  $G$  from an unselected stock population are generally preferred over realized  
664 estimates (Juga & Thompson 1989), our analyses show that both the ML base population  
665 estimate and the LS (realized) estimate performed well, while the REML stock population  
666 estimate provided less accurate predictions.

667 Despite considerable unexplained variation in selection response in both experiments, there was  
668 no systematic effect of selection direction on predictability- both antagonistic and concerted  
669 selection were similarly predictable in each dataset. Some previous work comparing the  
670 predictability of antagonistic and concerted selection suggests that short-term, bivariate selection  
671 is poorly predicted by the standard model (Berger & Harvey 1975; Bell & Burris 1973). Sheridan  
672 & Barker (1974) found that responses in all directions were well predicted during the short-term,  
673 but that predictability declined after 22 generations of selection and that changes in genetic  
674 correlations did not match expectations. Selection-induced changes in the joint distributions of  
675 traits may violate the standard assumption of multivariate normality (Barton & Turelli 1989) and  
676 also result in a gradually decreasing predictability of response to selection.

677 Although selection direction did not influence predictability, predictability of individual  
678 characters did vary overall, the relative amount of unexplained variation was substantially  
679 different for eyespot size and eyespot color composition, with size being more predictable than  
680 color. Within experiments, responses of EyeP and Eye4 were better predicted overall than  
681 responses of EyeA and Eye6. In each case, the eyespot with the smaller initial mean value and  
682 estimate of  $V_A$  (EyeA; Eye6) showed significant among-line heterogeneity in the agreement

683 between predicted and observed selection responses. In contrast, there was no significant among-  
684 line heterogeneity for the eyespot with the larger mean and estimate of  $V_A$  (EyeP; Eye4).  
685 Whether this suggests an important pattern or follows from a deviation from model assumptions  
686 which causes a dependence between trait means and variances requires further analysis.

687 Two of our attempts to improve the fit of models to the selection response had little effect:  
688 accounting for predictable changes in  $G$  caused by selection-induced linkage disequilibrium (the  
689 Bulmer effect) had only minimal effects on the residual sums of squares (amount of unexplained  
690 variation in response). Similarly, accounting for changes in  $P$  across generations also had no  
691 effect. There are many potential sources of variation in predictability of response, including drift,  
692 differing allele frequency changes in different lines, nonadditive genetic variation (e.g.,  
693 directional epistasis), gene-by-environment (GxE) interaction, selection acting on correlated  
694 traits, and environmental variation (Falconer & Mackay 1996) or environmental effects on the  $G$   
695 matrix (Wood & Brodie 2015). In our analysis, the most obvious explanation for the overall  
696 difference between experiments in amounts of unexplained variation (residual sums of squares  
697 after fitting selection response) is sampling effects on the average phenotype in finite populations  
698 (Lande, 1976). Sampling variance is proportional to the magnitude of the standing genetic  
699 variance; this is in agreement with the larger residual sum of squares for the eyespot size  
700 experiment ( $V_A$  eyespot size  $>$   $V_A$  eyespot color). Though drift is a likely cause of variation in the  
701 average trait values each generation (Hill, 1971), we cannot clearly attribute observed changes in  
702  $G$  to drift.

703

704 **Environmental effects are critical for accurate predictions.** Global environmental effects  
705 (those effects on eyespot character means shared across all lines within a given generation)  
706 account for a large proportion of the mismatch between predicted and observed selection  
707 responses in both data sets. In both experiments, accounting for environmental variation in the  
708 model improved predictions compared with models that accounted for selection-induced changes  
709 in *G* or *P* (Figs. 3 and 4). In contrast with typical analyses that rely on unselected control lines,  
710 we used all selected and unselected lines to estimate environmental effects (Falconer & Mackay  
711 1996). Though our approach inevitably leads to a better model fit, it also allows much more  
712 accurate estimation of the environmental effect than a comparison with a single control line  
713 (Sorensen & Kennedy 1984). This method is probably most robust when selection occurs in  
714 different directions with equal numbers of opposing lines, because systematic estimation bias  
715 might occur if selection were performed in only a limited number of directions.

716 Across-generation environmental effects were erratic, without significant trends over time. In  
717 addition, significant effects on eyespot means were frequently limited to a single eyespot out of  
718 the pair targeted by selection. Fluctuating food-plant quality over the course of each experiment  
719 is a possible source of such environmental variation. Food-plant quality and larval crowding can  
720 affect many aspects of larval growth and impact both wing pigment production and the  
721 appearance of individual wing color pattern characters (Gibbs & Breuker 2006; Talloen et al.  
722 2004). Other aspects of the general rearing environment, such as temperature or humidity, could  
723 also have fluctuated during the course of the two experiments and affected particular characters  
724 or individual eyespots (Brakefield et al., 1996).

725 Regardless of their source, environmental effects impact character means, and can push the  
726 selection response in a direction opposite to that otherwise predicted (compare panels a, c with b,  
727 d in Fig. 3). In Fig. 3, this is particularly clear in antagonistic selection directions, which showed  
728 strongly ‘jagged’ responses. Since jaggedness only appears in the predicted trajectories when we  
729 include environmental effects in the models, we can clearly identify environment as a major  
730 cause of apparent visual irregularity in antagonistic selection responses. General environmental  
731 effects can have wide-ranging impacts on many other aspects of the evolutionary process. When  
732 genotypes differ in their sensitivity to environmental variables, selection may directly alter  
733 environmental variance (Kaufman 1977; Scharloo 1972); changes in environmental sensitivity  
734 during an experiment can lead to apparent failure to respond to particular selection pressures  
735 (Jinks et al. 1977). In *B. anynana*, substantial family-by-environment variation for wing color  
736 pattern characters (Windig 1994) could also account for portions of the variation in selection  
737 response that remains after general environmental effects are accounted for.

738

739 *Does G change during the course of short-term selection?*

740

741 By generation nine of the size selection experiment, we observed significant changes to  
742 parameters of  $\mathbf{G}$  in two of the four lines sampled (and marginally significant changes in a third  
743 line; Table 6). In each case, the best fit model indicated that the genetic correlation between  
744 EyeA and EyeP remained stable, despite significant changes in  $V_A$  for one or both of the  
745 eyespots. These observed changes in  $\mathbf{G}$  are striking when compared with infinitesimal  
746 predictions based on Eqn. 3: observed changes in variance components are much larger (and

747 frequently differ in sign) than predicted changes due to selection-induced equilibrium alone. It is  
748 possible that our choice of populations that were split again, simply lacked power to detect the  
749 full range of changes in  $\mathbf{G}$ , since infinitesimal predictions led us to expect modest shifts in the  
750 magnitude of the genetic correlation  $r_G$  in all four of the lines analyzed (Table 5). Estimates of  
751 changes depended a lot on whether the some parameters were constrained to zero or not. That  
752 suggests that model selection bias is probable and that we should not overinterpret these results.  
753 Nevertheless, our analyses suggest that we must consider factors other than drift and gametic-  
754 phase disequilibrium to explain the changes observed between Gen0 and Gen9, as these would  
755 both produce clear decreases in additive genetic variances. Given the results of the generalized  
756 additive models (gam's) fitted to prediction errors, the pattern for the two eyespot size traits  
757 seems to suggest that directional epistasis might occur for them. Such directional epistasis might  
758 simply follow from the shape of threshold traits translating liabilities to traits constrained  
759 between 0 and 100%, but the increase of prediction error and thus a small acceleration in the  
760 response when EyeP is around 80% argues against that. As we found substantial environmental  
761 effect on trait means, we should consider environmental effects on  $\mathbf{G}$  too, although it is unclear  
762 of which magnitude these are expected to be (Wood & Brodie 2015).

763

764

765 Conclusion

766

767 Our results clearly call for an effort to extend the multivariate breeder's equation with a suite of  
768 mechanistic models that can be fitted to multi-trait data and which allow for environmental  
769 effects and different trait-specific mechanisms translating allelic variation into genetic variances,  
770 genetic correlations and phenotypes. In our study, the breeder's equation adequately predicts  
771 selection responses, but more mechanistic quantitative genetic models might make it easier to  
772 resolve discussions on the adequacy of quantitative genetics by allowing a wider variety of  
773 postulated mechanisms to be fitted to data and compared statistically.

774

775 **ACKNOWLEDGMENTS**

776 We thank K. Koops, N. Wurzer, M. Lavrijsen, and F. Kesbeke for their invaluable assistance  
777 with caterpillar and butterfly care, and J. Wolf, W. Frankino, B.J. Zwaan, and P.M Brakefield for  
778 discussion and insights at different stages of the project. Comments from M. Blows and D.Emlen  
779 greatly improved the manuscript. We thank the Dutch Scientific Organization (NWO) for  
780 funding: VENI 863.03.004 (TJMVD), ALW 813.04.002 (supporting CEA), VIDI 864.08.010  
781 (PB).

782 **CONFLICT OF INTEREST DISCLOSURE**

783 The authors of this preprint declare that they have no financial conflict of interest with the  
784 content of this article.

785 **SYMBOLS**

786

787

788 ***G*** Additive genetic variance-covariance matrix

789 ***G*<sub>0</sub>** ***G*** matrix of the starting population (*G*<sub>0</sub>)

790 ***P*** Phenotypic variance-covariance matrix

791 ***P*<sub>0</sub>** ***P*** matrix of the starting population (*G*<sub>0</sub>)

792 ***P*\*** ***P*** matrix of selected parents only

793 ***s*** Selection differential

794 ***μ*** population mean

795

796

797 **ABBREVIATIONS**

798

799

800 EyeA Anterior dorsal forewing eyespot

801 EyeP Posterior dorsal forewing eyespot

802 Eye4 Fourth eyespot on the ventral hindwing

803 Eye6 Sixth eyespot on the ventral hindwing

804 Gen0 Starting population for a selection experiment

805 Gen1- Gen10 Subsequent offspring generations during a selection experiment

806 A+P+ Concerted selection; both eyespots A, P selected for increased size

807 A-P- Concerted selection; both eyespots A, P selected for decreased size

808 A+P- Antagonistic selection; A selected for increased and P for decreased size

809 A-P+ Antagonistic selection; A selected for decreased and P for increased size

810 4G6G Concerted selection lines; both eyespots 4 and 6 selected for increased gold

811 4B6B Concerted selection lines; both eyespots 4 and 6 selected for increased black

812 4B6G Antagonistic selection; 4 selected for increased black, 6 for increased gold

813 4G6B Antagonistic selection; 4 selected for increased gold, 6 for increased black

814 UC Unselected control lines

815 ML Maximum likelihood

816 AIC Akaike Information Criterion

817

818 **LITERATURE CITED**

819

820 Akaike, H. 1973. Information theory and an extension of the maximum likelihood principle. Pp. 267-281  
821 in B. N. Petrov, and F. Csaki, eds. Second International Symposium on Information Theory.  
822 Akademiai Kiado, Budapest.

823 Allen CE, Beldade P, Zwaan BJ, Brakefield PM. 2008. Differences in the selection response of serially  
824 repeated color pattern characters: Standing variation, development, and evolution. BMC Evol Biol  
825 8:94.

826 Arnold SJ, Bürger R, Hohenlohe PA, Ajie BC, Jones AG. 2008. Understanding the evolution and stability  
827 of the G-Matrix. Evolution 62: 2451-2461.

828 Barton NH, Etheridge AM, Véber A. 2017. The infinitesimal model: Definition, derivation, and  
829 implications. Theoretical population biology 118:50-73.

830 Beldade P, Brakefield PM. 2002. The genetics and evo-devo of butterfly wing patterns. Nat Rev Genet  
831 3:442-452.

832 Beldade P, Brakefield PM, Long AD. 2002a. Contribution of *Distal-less* to quantitative variation in  
833 butterfly eyespots. Nature 415:315-318.

834 Beldade P, Koops K, Brakefield PM. 2002b. Developmental constraints versus flexibility in  
835 morphological evolution. Nature 416:844-847.

836 Beldade P, Koops K, Brakefield PM. 2002c. Modularity, individuality, and evo-devo in butterfly wings.  
837 Proc Natl Acad Sci USA 99:14262-14267.



- 838 Beldade P, French V, Brakefield PM. 2008. Developmental and genetic mechanisms for evolutionary  
839 diversification of serial repeats: eyespot size in *Bicyclus anynana* butterflies. J Exp Zool Part B  
840 310B:191-201.
- 841 Bell AE, Burris MJ. 1973. Simultaneous selection for two correlated traits of *Tribolium*. Genet Res 21:29-  
842 46.
- 843 Beniwal BK, Hastings IM, Thompson R, Hill WG. 1992. Estimation of changes in genetic parameters in  
844 selected lines of mice using REML with an animal model. 2. Body weight, body composition and  
845 litter size. Heredity 69:361-371.
- 846 Berger PJ, Harvey WR. 1975. Realized genetic parameters from index selection in mice 1. J Animal Sci  
847 40: 38-47.
- 848 Brakefield PM, El Filali E, van der Laan R, Breuker CJ, Saccheri IJ, Zwaan B. 2001. Effective population  
849 size, reproductive success and sperm precedence in the butterfly, *Bicyclus anynana*, in captivity. J  
850 Evol Biol 14:148-156.
- 851 Brakefield PM, Gates J, Keys D, Kesbeke F, Wijngaarden PJ, Monteiro A, French F, Carroll SB. 1996.  
852 Development, plasticity and evolution of butterfly eyespot patterns. Nature 384:236-242.
- 853 Bulmer M. 1971. The effect of selection on genetic variability. Am Nat 105:201-211.
- 854 Bulmer MG. 1976. Effect of selection on genetic variability - Simulation study. Genet Res 28:101-117.
- 855 Cox DR, Hinkley DV. 1974. Theoretical Statistics. Chapman & Hall, London.
- 856 Falconer DS, Mackay TFC. 1996. Introduction to Quantitative Genetics. Longman, Essex, UK.

- 857 Gibbs M, Breuker CJ. 2006. Effect of larval rearing density on adult life history traits and developmental  
858 stability of the dorsal eyespot pattern in the speckled wood butterfly *Parage aegeria*. Entomol Exp  
859 Appl 118:41-47.
- 860 Gilchrist MA, Nijhout HF. 2001. Nonlinear developmental processes as sources of dominance. Genetics  
861 159:423-432.
- 862 Heath SC, Bulfield G, Thompson R, Keightley PD. 1995. Rates of change of genetic parameters of body  
863 weight in selected mouse lines. Genet Res 66:19-25.
- 864 Hill WG. 1971. Design and efficiency of selection experiments for estimating genetic parameters.  
865 Biometrics 27:293-311.
- 866 Hill WG. 2010. Understanding and using quantitative genetic variation. Phil Trans Roy Soc B: Biol Sci  
867 365:73-85.
- 868 Hill WG. 2011. Can more be learned from selection experiments of value in animal breeding  
869 programmes? Or is it time for an obituary? J Animal Breeding Genet 128:87-94.
- 870 Ihaka R, Gentleman R. 1996. R: A language for data analysis and graphics. J Compu Graph Stat 5:299-  
871 314.
- 872 Jinks JL, Jayasekara NEM, Boughey H. 1977. Joint selection for both extremes of mean performance and  
873 of sensitivity to a macroenvironmental variable. II. Single seed descent. Heredity 39:345-355.
- 874 Johnson T, Barton N. 2005. Theoretical models of selection and mutation on quantitative traits. Phil Trans  
875 Roy Soc B: Biol Sci 360:1411-1425.
- 876 Juga J, Thompson R. 1989. Estimation of variance components in populations selected over multiple  
877 generations. Acta Agriculturae Scandinavica 39:79-89.

- 878 Kaufman PK, Enfield FD, Comstock RE. 1977. Stabilizing selection for pupa weight in *Tribolium*  
879 *castaneum*. *Genetics* 87:327-341.
- 880 Lande R. 1976. Natural selection and random genetic drift in phenotypic evolution. *Evolution* 30:314-  
881 334.
- 882 Lande R. 1979. Quantitative genetic analysis of multivariate evolution, applied to brain: body allometry.  
883 *Evolution* 33:402-416.
- 884 Le Rouzic A, Houle D, Hansen TF. 2011. A modelling framework for the analysis of artificial-selection  
885 time series. *Genet Res* 93:155-173.
- 886 Lindsey JK. 1999. *Models for Repeated Measurements*. Oxford University Press, Oxford.
- 887 Lynch M, Walsh B. 1998. *Genetics and analysis of quantitative traits*. Sinauer Associates, Sunderland,  
888 MA.
- 889 Meyer K, Hill WG. 1991. Mixed model analysis of a selection experiment for food intake in mice. *Genet*  
890 *Res* 57:71-81.
- 891 Monteiro A, Brakefield PM, French F. 1994. The evolutionary genetics and developmental basis of wing  
892 pattern variation in the butterfly *Bicyclus anynana*. *Evolution* 48:1147-1157.
- 893 Monteiro A, Brakefield PM, French V. 1997. Butterfly eyespots: the genetics and development of the  
894 color rings. *Evolution* 51:1207-1216.
- 895 Okada I, Hardin RT. 1967. An experimental examination of restricted selection index, using *Tribolium*  
896 *castaneum*. I. The results of two-way selection. *Genetics* 57:227-236.
- 897 Pawitan Y. 2001. *In all Likelihood: Statistical Modeling and Inference using Likelihood*. Oxford  
898 University Press, Oxford.

- 899 Pigliucci M, Schlichting CD. 1997. On the limits of quantitative genetics for the study of phenotypic  
900 evolution. *Acta Biotheor* 45:143-160.
- 901 Roff DA. 2007. A centennial celebration for quantitative genetics. *Evolution* 61:1017-1032.
- 902 Scharloo WA, Zweep A, Schuitema KA, Wijnstra JG. 1972. Stabilizing and disruptive selection on a  
903 mutant character in *Drosophila*. IV. Selection on sensitivity to temperature. *Genetics* 71:551-566.
- 904 Sheridan AK. 1988. Agreement between estimated and realised genetic parameters. *Animal Breeding*  
905 Abstracts 56:877-889.
- 906 Sheridan AK, Barker JSF. 1974. Two-trait selection and the genetic correlation II. Changes in the genetic  
907 correlation during two-trait selection. *Australian J Biol Sci* 27:89-102.
- 908 Sorensen DA, Kennedy BW. 1984. Estimation of response to selection using least-squares and mixed  
909 model methodology. *J Anim Sci* 58:1097-1106.
- 910 Talloen WH, van Dyck R, Lens L. 2004. The cost of melanization: Butterfly wing coloration under  
911 environmental stress. *Evolution* 58:360-366.
- 912 Turelli M. 2017. Fisher's infinitesimal model: A story for the ages. *Theoretical population biology*  
913 118:46-49.
- 914 Turelli M, Barton NH. 1994. Genetic and statistical analyses of strong selection on polygenic traits: What,  
915 me normal? *Genetics* 158:913-941.
- 916 Venables WN, Ripley BD. 2002. *Modern Applied Statistics with S*. Springer, New York.
- 917 Verbeke G, Molenberghs G. 1997. *Linear Mixed Models in Practice: A SAS-Oriented Approach*.  
918 Springer, New York.

- 919 Windig JJ. 1994. Genetic correlations and reaction norms in wing pattern of the tropical butterfly *Bicyclus*  
920 *anymana*. *Heredity* 73:459-470.
- 921 Wood CW, Brodie ED. 2015. Environmental effects on the structure of the G-matrix. *Evolution* 69:2927-  
922 2940.
- 923 Zhang X-S, Hill WG. 2005. Predictions of patterns of response to artificial selection in lines derived from  
924 natural populations. *Genetics* 169:411-425.
- 925
